# Supplementary material
Source: PubMed Central journal article supplement (PMC2804155)

### Supplementary Figure Legends.

**Figure 1.** (A) Total RNA from WT and  $\beta 1^{-/-}$  mouse hearts was reverse transcribed, and PCR amplified with primers specific for the 5' and 3' ends of the  $\beta 1$  (*prkab1*) ORF (NCBI Gene ID #19079). The agarose gel image shows a single 813 bp amplicon, reflecting the correctly spliced WT mRNA species (shown to right). Amplification of mRNA from  $\beta 1^{-/-}$  mice, produced the expected 440 bp transcript and an additional alternatively spliced species (320bp). DNA sequencing was used to confirm both  $\beta 1^{-/-}$  splice variants (shown on the right).

**Figure 2.** (A) AMPK  $\beta 1$  was immunoprecipitated from livers of WT and  $\beta 1^{-/-}$  mice using an N-terminal  $\beta 1$  antibody. AMPK  $\alpha$  and  $\gamma$  co-immunoprecipitated with  $\beta 1$  in WT mice but not  $\beta 1^{-/-}$  mice.

**Figure 3.** Histopathology of wildtype (left) and  $\beta 1^{-/-}$  (right) mouse brain

**Figure 4.** A) Basal and insulin stimulated lipogenesis in isolated fat explants from WT and  $\beta 1^{-/-}$  mice. B) Basal and isopreterenol stimulated lipolysis in isolated fat explants from WT and  $\beta 1^{-/-}$  mice. All values are mean  $\pm$  SEM, n = 6-8, \* = p < 0.05 compared to wildtype.

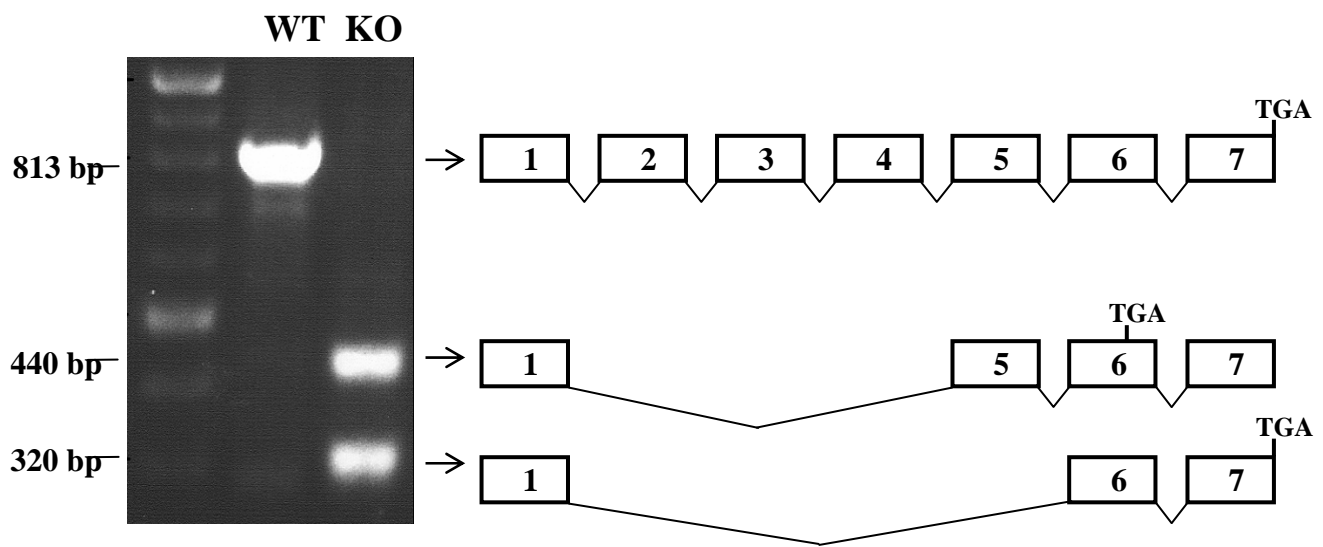

Supplementary Figure 1

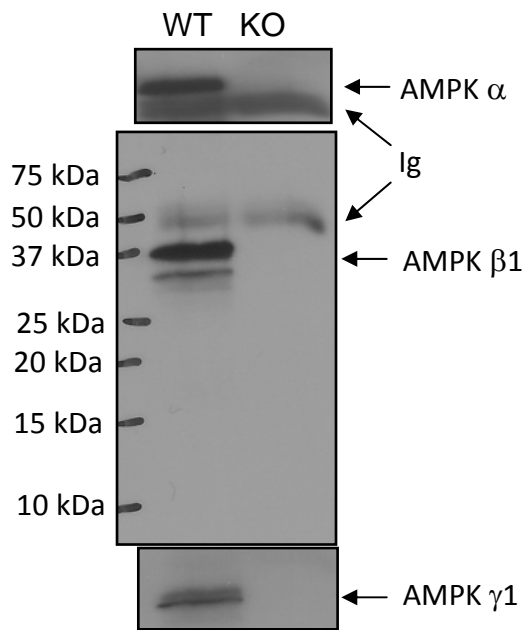

Supplementary Figure 2

WT

$\beta 1^{-/-}$

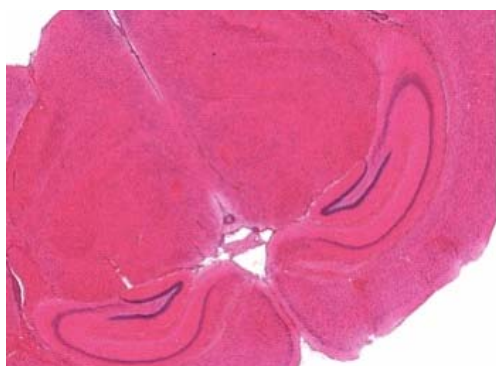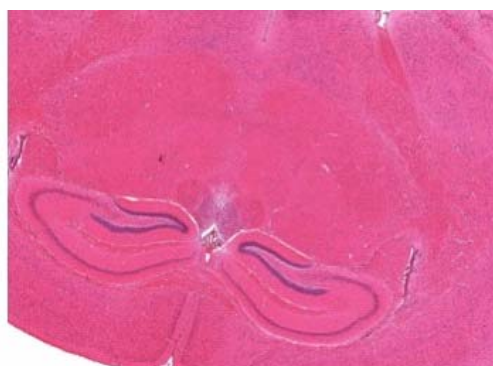

Hippocampus

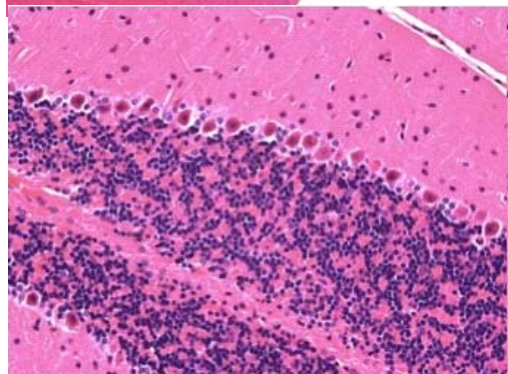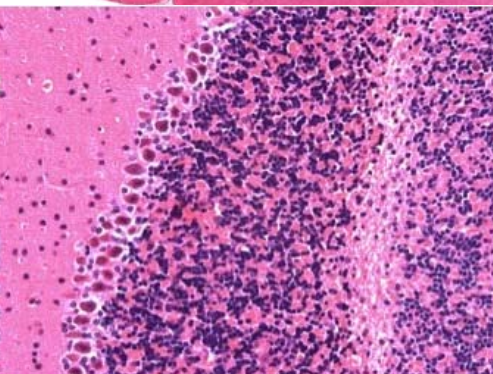

Cerebellum

A

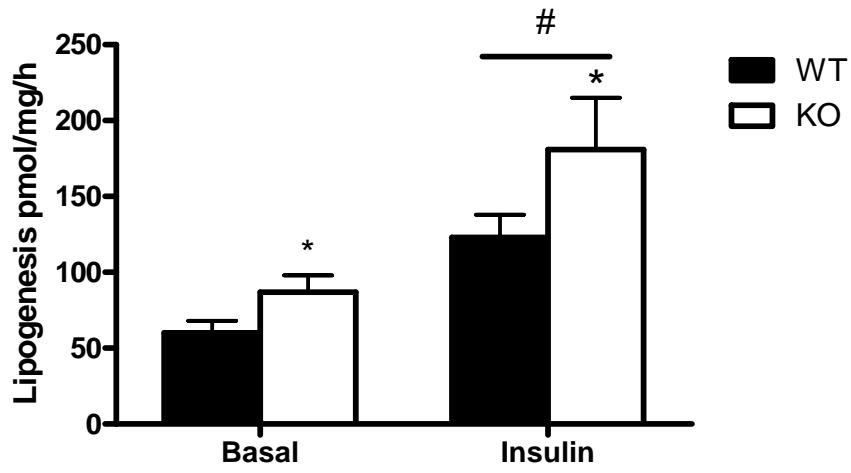

B

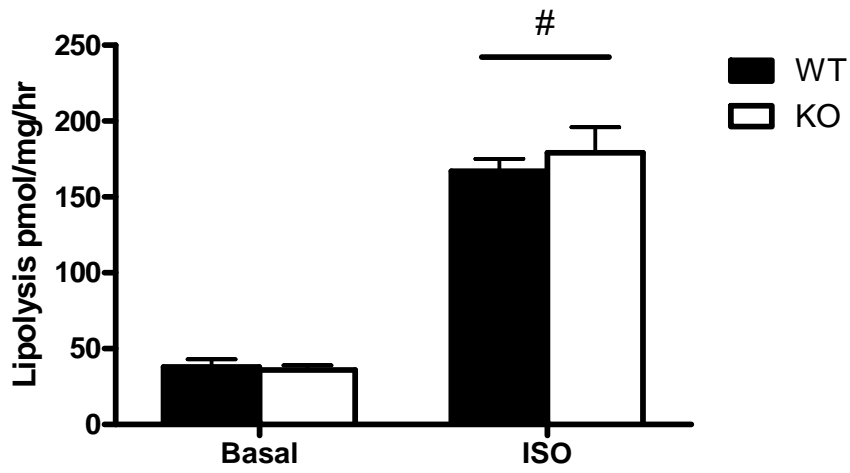

Supplement: supp_M109.056762_jbc.M109.056762-1.pdf [file supp_M109.056762_jbc.M109.056762-1.pdf]
